# Supplementary material
Source: MDPI journal article supplement (https://www.mdpi.com/2673-4079/2/3/27)
Supplement: s1 [file s1]

## SUPPORTING MATERIALS

# Alkyl levulinate from furfuryl alcohol using CT151 Purolite as heterogenous catalyst: optimization, purification, and recycling

Mattia Annatelli, Giacomo Trapasso, Lucrezia Lena, and Fabio Aricò

## CONTENTS

|                                                                          |   |
|--------------------------------------------------------------------------|---|
| Pictures of furfuryl alcohol and ethyl levulinate degradation .....      | 2 |
| Purolite and Amberlyst-15 physical and chemical characteristics .....    | 2 |
| Synthesis of EtLev from FA varying temperatures and solvent amount ..... | 3 |
| Preliminary investigation for catalyst recycling.....                    | 4 |
| <sup>1</sup> H-NMR, <sup>13</sup> C-NMR & Mass – Spectra .....           | 5 |

## Pictures of furfuryl alcohol and ethyl levulinate degradation

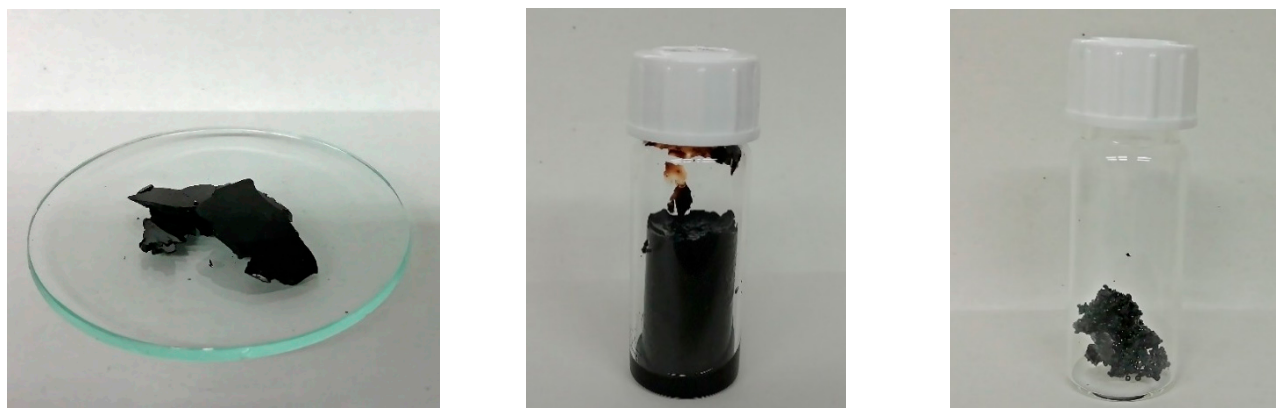

**Figure S1.** Examples of the substrate/product degradation observed without previous filtration on basic alumina; starting from the left: reaction conducted in presence of  $\text{H}_2\text{SO}_4$ ,  $\text{BF}_3\text{-O}(\text{Et})_2$  and Amberlyst-15 as acid catalysts.

## Purolite and Amberlyst-15 physical and chemical characteristics

**Table S1.** Purolite and Amberlyst-15 physical and chemical characteristics.<sup>a</sup>

|                             | CT275                                                   | CT269                             | CT151                             | Amberlyst-15                             |
|-----------------------------|---------------------------------------------------------|-----------------------------------|-----------------------------------|------------------------------------------|
| <b>Polymer Structure</b>    | Macroporous polystyrene crosslinked with divinylbenzene |                                   |                                   |                                          |
| <b>Appearance</b>           | Spherical Beads                                         |                                   |                                   |                                          |
| <b>Functional Group</b>     | Sulfonic Acid                                           |                                   |                                   |                                          |
| <b>Ionic Form</b>           | $\text{H}^+$ form                                       |                                   |                                   |                                          |
| <b>Particle Size Range</b>  | 425 - 1200 $\mu\text{m}$                                |                                   |                                   | < 300 $\mu\text{m}$                      |
| <b>Dry Weight Capacity</b>  | 5.2 eq/kg<br>( $\text{H}^+$ form)                       | 5.2 eq/kg<br>( $\text{H}^+$ form) | 5.1 eq/kg<br>( $\text{H}^+$ form) | $\geq 4.7$ eq/kg<br>( $\text{H}^+$ form) |
| <b>Moisture Retention</b>   | 51 - 59 %<br>( $\text{H}^+$ form)                       | 51 - 57 %<br>( $\text{H}^+$ form) | 54 - 59 %<br>( $\text{H}^+$ form) | $\leq 1.6\%$ ( $\text{H}^+$ form)        |
| <b>Surface Area</b>         | 20 - 40 $\text{m}^2/\text{g}$                           | 35 - 50 $\text{m}^2/\text{g}$     | 15 - 25 $\text{m}^2/\text{g}$     | 53 $\text{m}^2/\text{g}$                 |
| <b>Pore Volume</b>          | 0.40 - 0.60 $\text{mL/g}$                               | 0.30 - 0.50 $\text{mL/g}$         | 0.15 - 0.30 $\text{mL/g}$         | 0.40 $\text{mL/g}$                       |
| <b>Median Pore Diameter</b> | 400 - 700 $\text{\AA}$                                  | 250 - 425 $\text{\AA}$            | 250 - 400 $\text{\AA}$            | 300 $\text{\AA}$                         |
| <b>Temperature Limit</b>    | 130 $^\circ\text{C}$                                    | 130 $^\circ\text{C}$              | 150 $^\circ\text{C}$              | 120 $^\circ\text{C}$                     |

a) All information is available on the Purolite® website (<https://www.purolite.com/index>). All Amberlyst-15 information are available on the DuPont website (<https://www.dupont.com/content/dam/dupont/amer/us/en/water-solutions/public/documents/en/45-D00927-en.pdf>)

## Synthesis of EtLev from FA varying temperatures and solvent amount

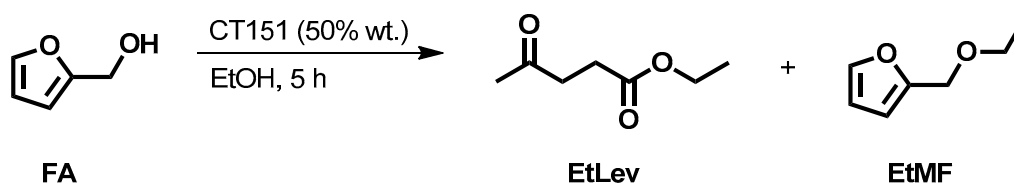

**Scheme S1.** Reaction scheme of EtLev synthesis.

**Table S2.** Synthesis of EtLev starting from FA at different temperatures.<sup>a</sup>

| # | Temp.<br>(°C) | Conv. <sup>b</sup><br>(%) | <sup>1</sup> H-NMR Yield<br>(%) |      |
|---|---------------|---------------------------|---------------------------------|------|
|   |               |                           | EtLev                           | EtMF |
| 1 | 80            | 100                       | 71                              | 0    |
| 2 | 60            | 100                       | 31                              | 6    |
| 3 | 40            | 100                       | 10                              | 19   |
| 4 | 30            | 91                        | 6                               | 14   |
| 5 | R.T.          | 50                        | 5                               | 16   |

a) Reaction conditions: **FA** (1.0 g) in ethanol (20.0 mL), CT151 (50% wt.) for 5h; b) Conversion determined via NMR.

**Table S3.** Synthesis of EtLev starting from FA employing different solvent amount.<sup>a</sup>

| # | EtOH<br>(mL) | Conv. <sup>b</sup><br>(%) | <sup>1</sup> H-NMR Yield<br>(%) |      |
|---|--------------|---------------------------|---------------------------------|------|
|   |              |                           | EtLev                           | EtMF |
| 1 | 40           | 100                       | 63                              | 0    |
| 2 | 20           | 100                       | 71                              | 0    |
| 3 | 10           | 100                       | 39                              | 0    |
| 4 | 5            | 100                       | 34                              | 0    |

a) Reaction conditions: **FA** (1.0 g) in ethanol (20.0 mL), CT151 (50% wt.) for 5h; b) Conversion determined via NMR.

## Preliminary investigation for catalyst recycling

**Table S4.** Synthesis of EtLev starting from FA: Preliminary investigation for catalyst recycling.<sup>a</sup>

|                                | # | CT151 (%<br>wt.) | <sup>1</sup> H-NMR Yield (%) |      |
|--------------------------------|---|------------------|------------------------------|------|
|                                |   |                  | EtLev                        | EtMF |
| Stirring                       | 1 | 50               | 71                           | 0    |
| No stirring                    | 2 | 50               | 23                           | 3    |
| Nitrogen flow without stirring | 3 | 50               | 57                           | 0    |
| No stirring                    | 4 | 100              | 66                           | 0    |

a) Reaction conditions: FA (1.0 g) in ethanol (20 mL), CT151 at 80 °C for 5h.

## **$^1\text{H}$ -NMR, $^{13}\text{C}$ -NMR & Mass – Spectra**

$^1\text{H}$ -NMR,  $^{13}\text{C}$ -NMR spectra of Methyl Levulinate (MeLev)

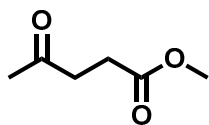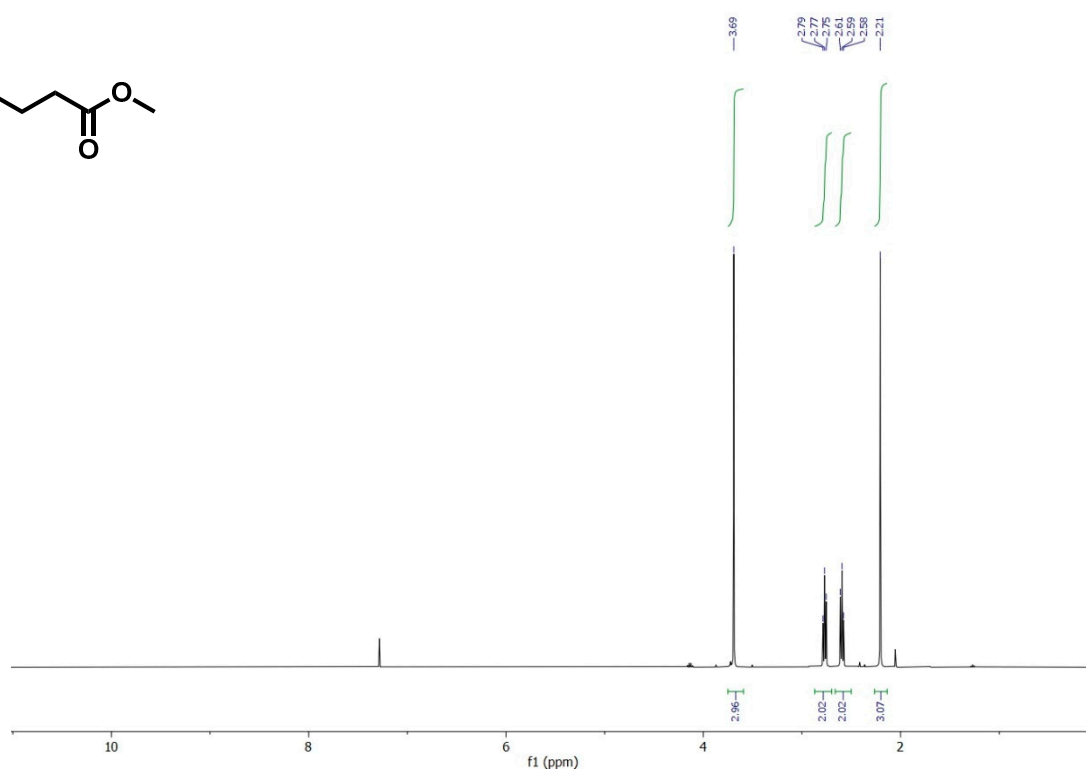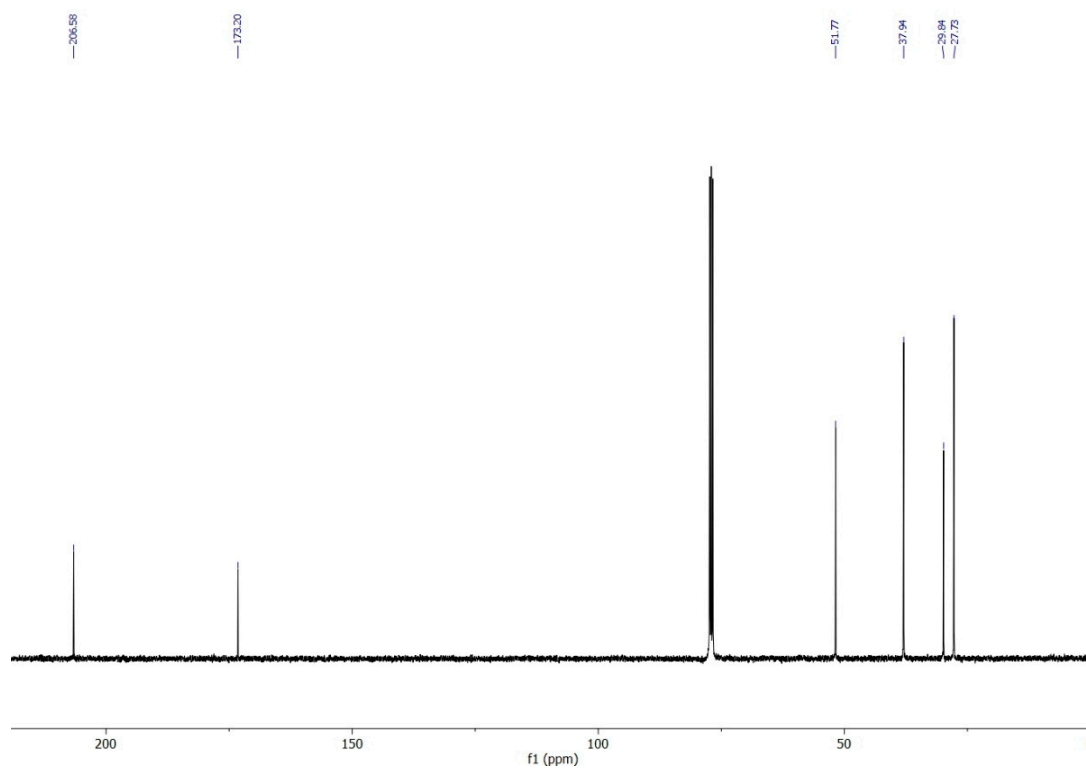

<sup>1</sup>H-NMR, <sup>13</sup>C-NMR spectra of Ethyl Levulinate (EtLev)

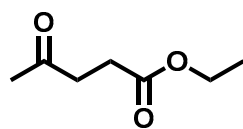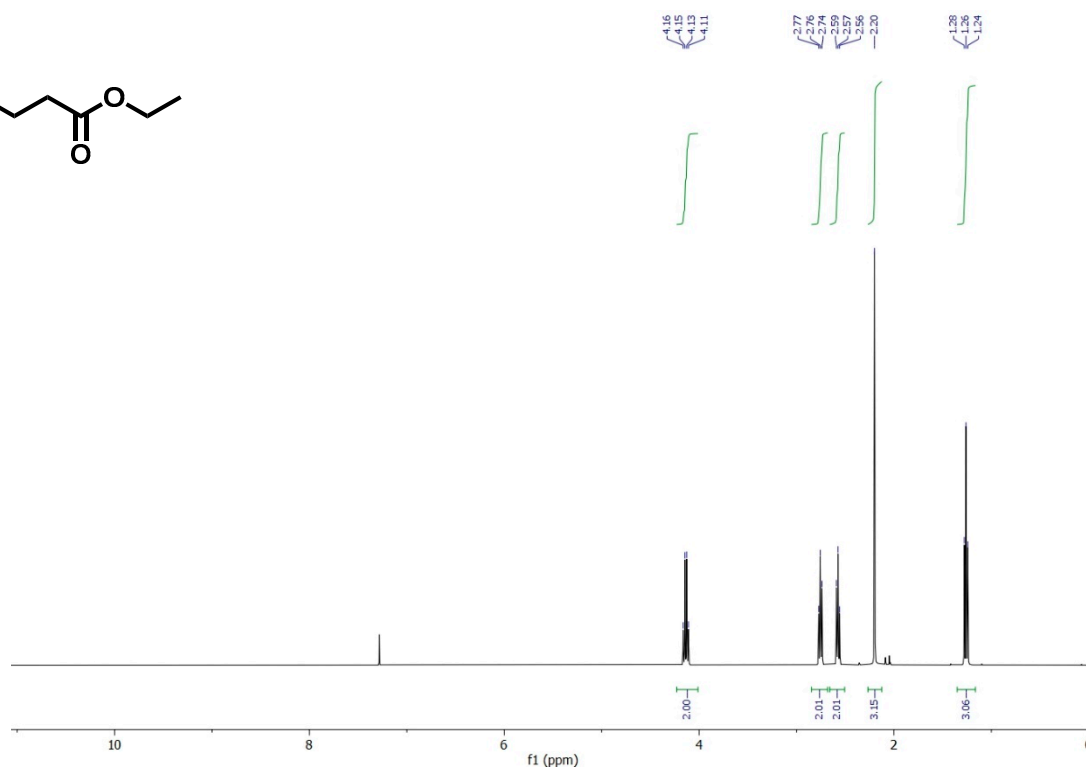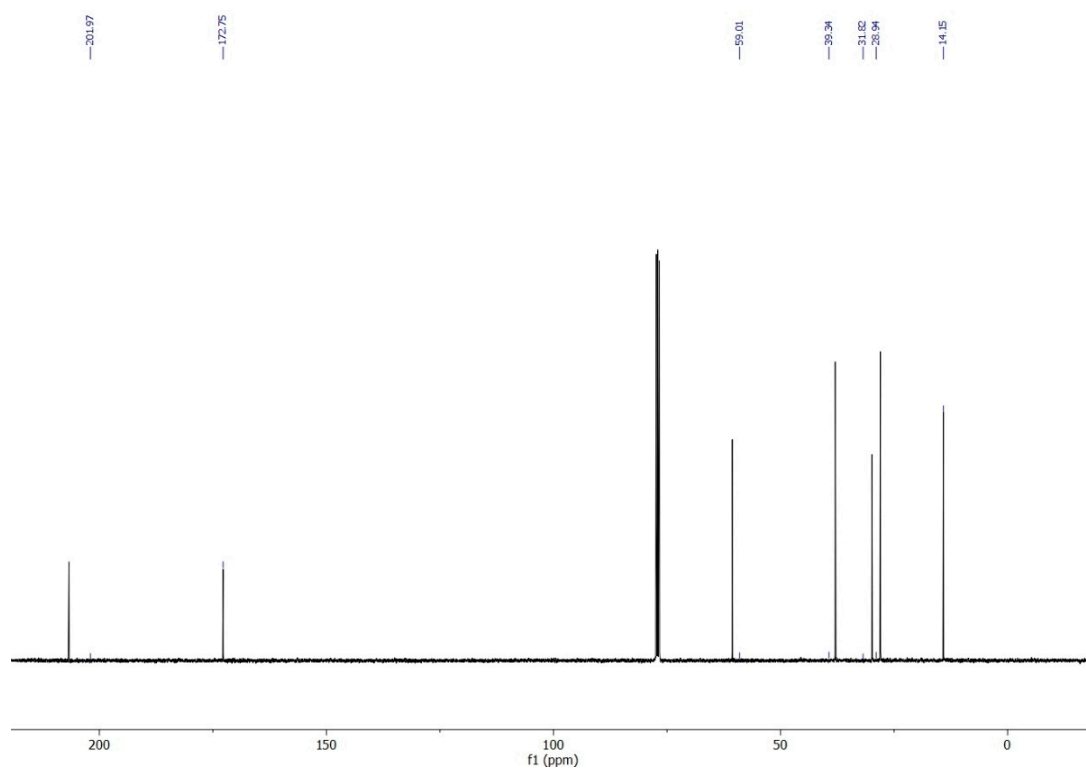

**$^1\text{H}$ -NMR,  $^{13}\text{C}$ -NMR spectra of Isopropyl Levulinate (iPrLev)**

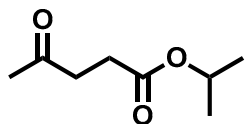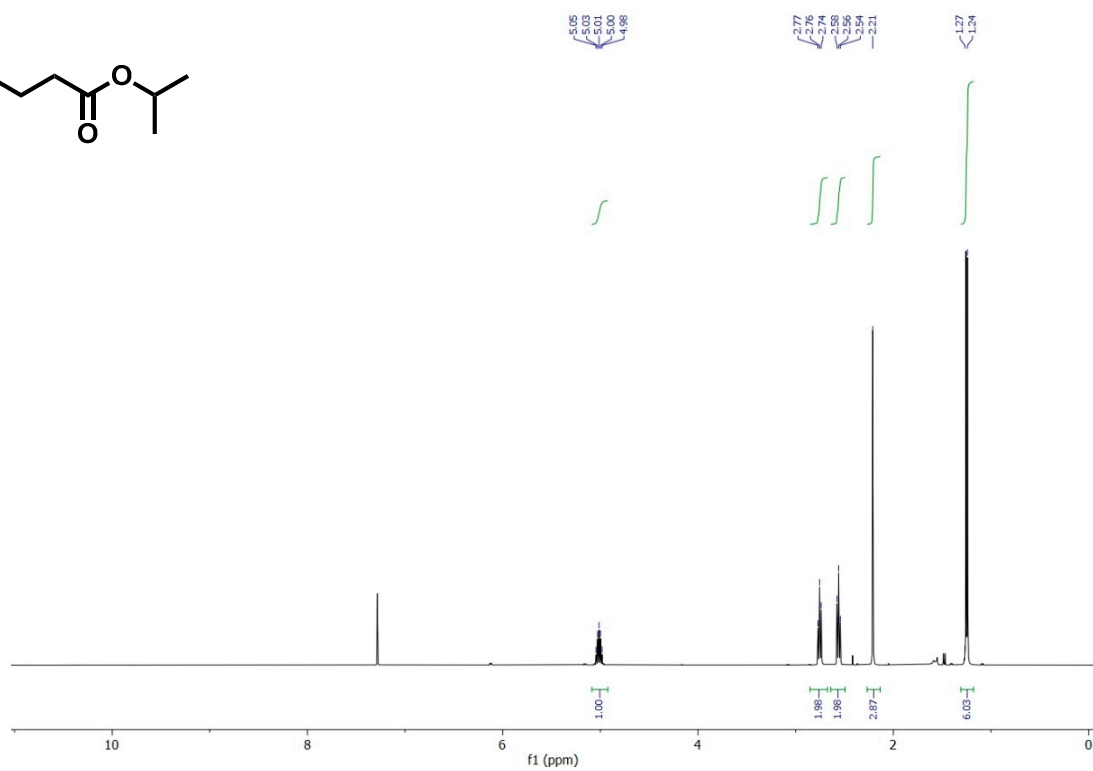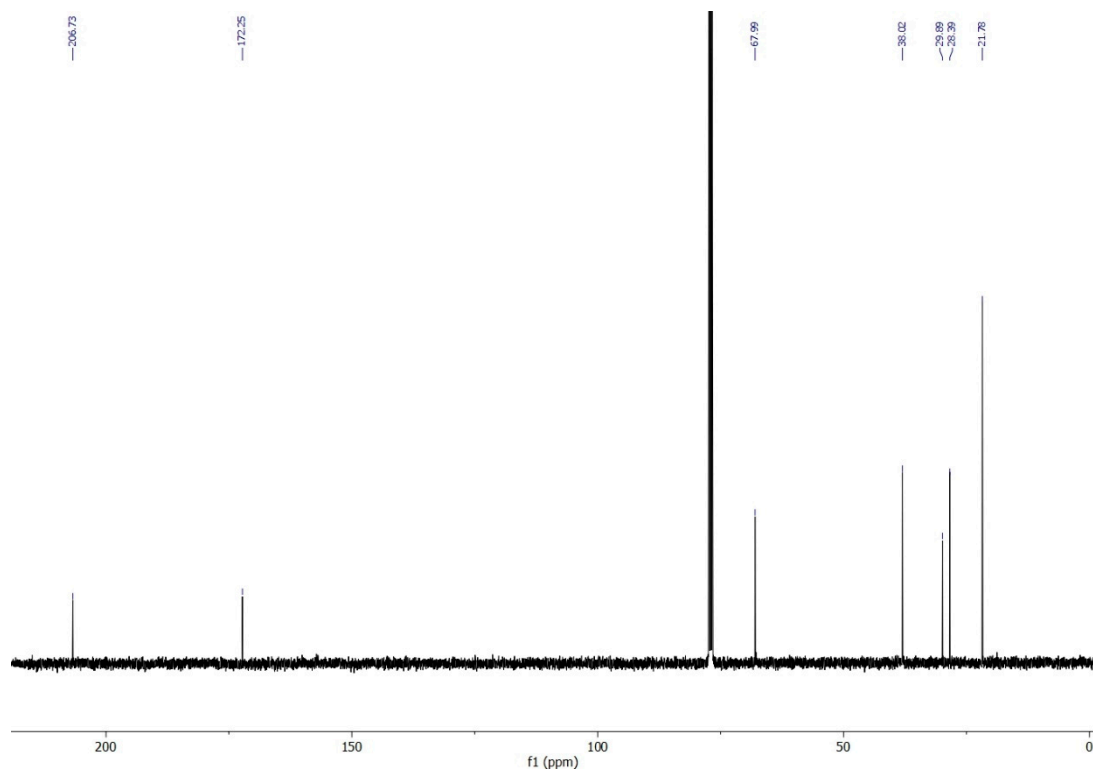



# $^1\text{H}$ -NMR, $^{13}\text{C}$ -NMR and Hi-Res Mass Spectra of Butyl Levulinate (BuLev)

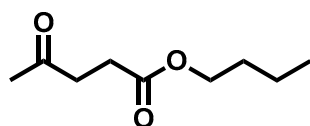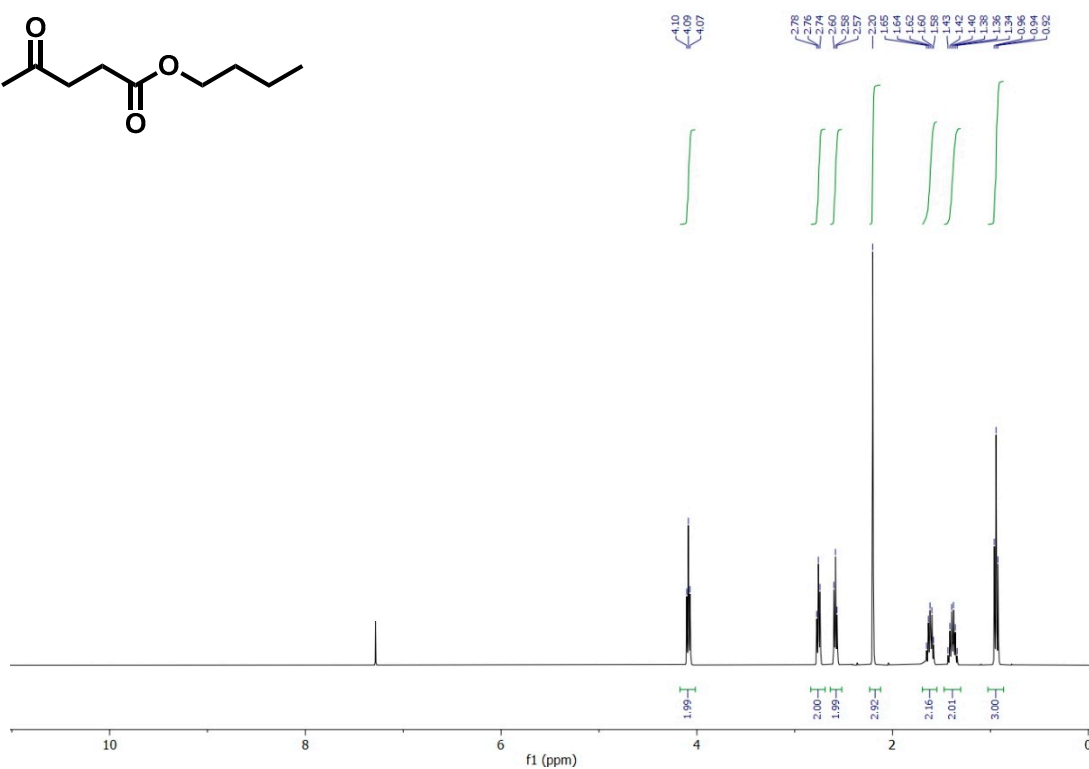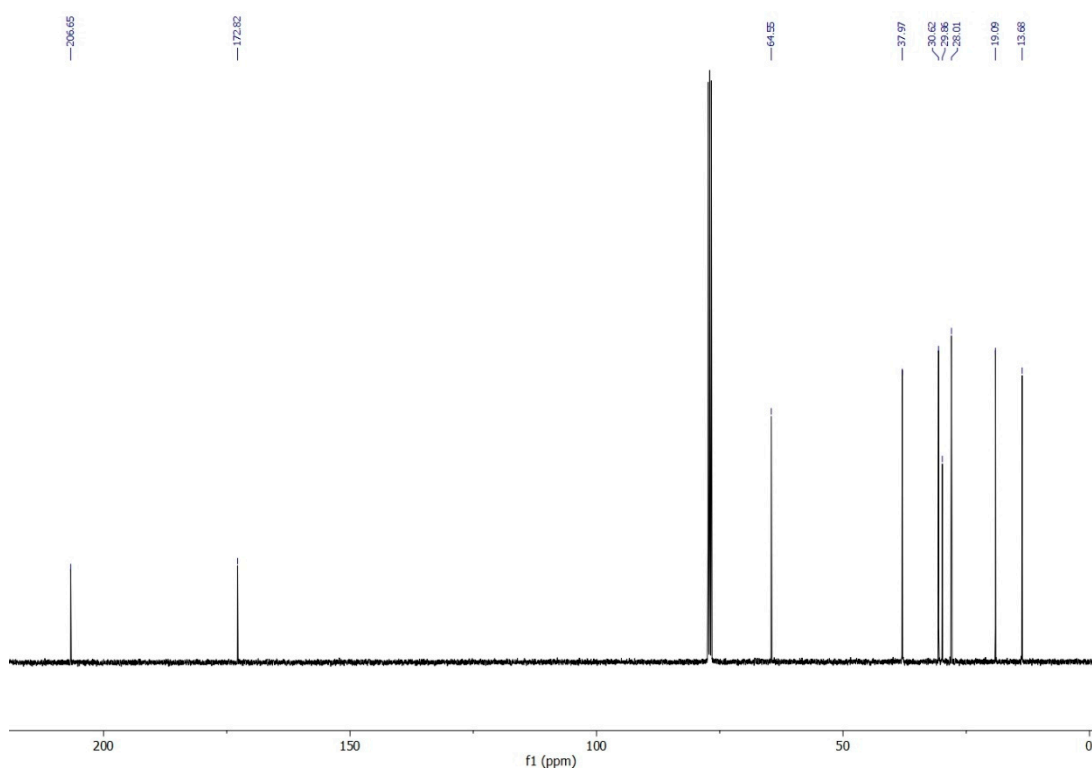

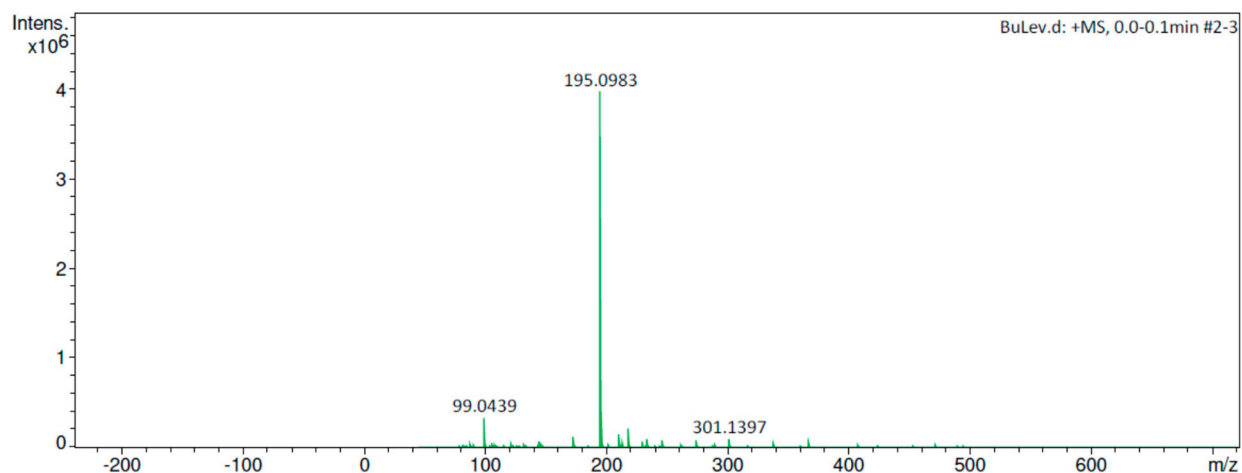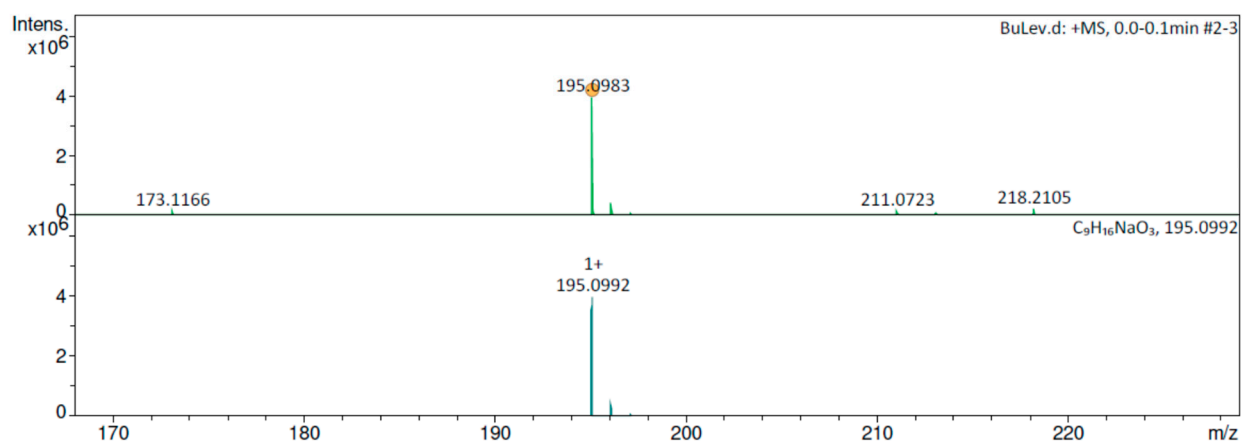

| Meas. m/z | # | Ion Formula                                       | m/z      | err [ppm] | mSigma | # mSigma | Score  | rdB | e <sup>-</sup> | Conf | N-Rule |
|-----------|---|---------------------------------------------------|----------|-----------|--------|----------|--------|-----|----------------|------|--------|
| 195.0983  | 1 | C <sub>9</sub> H <sub>16</sub> NaO <sub>3</sub>   | 195.0992 | 4.2       | 1.9    | 1        | 100.00 | 2.0 | even           |      | ok     |
|           | 2 | C <sub>5</sub> H <sub>12</sub> N <sub>6</sub> NaO | 195.0965 | -9.6      | 15.4   | 2        | 40.18  | 3.0 | even           |      | ok     |

#### Analysis Info

Analysis Name D:\Data\Jack\LipidomicaEMA190521\Mattia210521\BuLev.d  
 Method DirectInfusion - MS - positive.m  
 Sample Name BuLev  
 Comment

Acquisition Date 5/21/2021 4:38:22 PM

Operator Demo User  
 Instrument compact 8255754.20209

#### Acquisition Parameter

|             |            |                       |           |                  |           |
|-------------|------------|-----------------------|-----------|------------------|-----------|
| Source Type | ESI        | Ion Polarity          | Positive  | Set Nebulizer    | 0.4 Bar   |
| Focus       | Not active | Set Capillary         | 4500 V    | Set Dry Heater   | 180 °C    |
| Scan Begin  | 50 m/z     | Set End Plate Offset  | -500 V    | Set Dry Gas      | 4.0 l/min |
| Scan End    | 1000 m/z   | Set Collision Cell RF | 650.0 Vpp | Set Divert Valve | Source    |

$^1\text{H}$ -NMR,  $^{13}\text{C}$ -NMR spectra of *sec*-Butyl Levulinate (sBuLev)

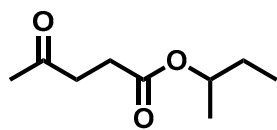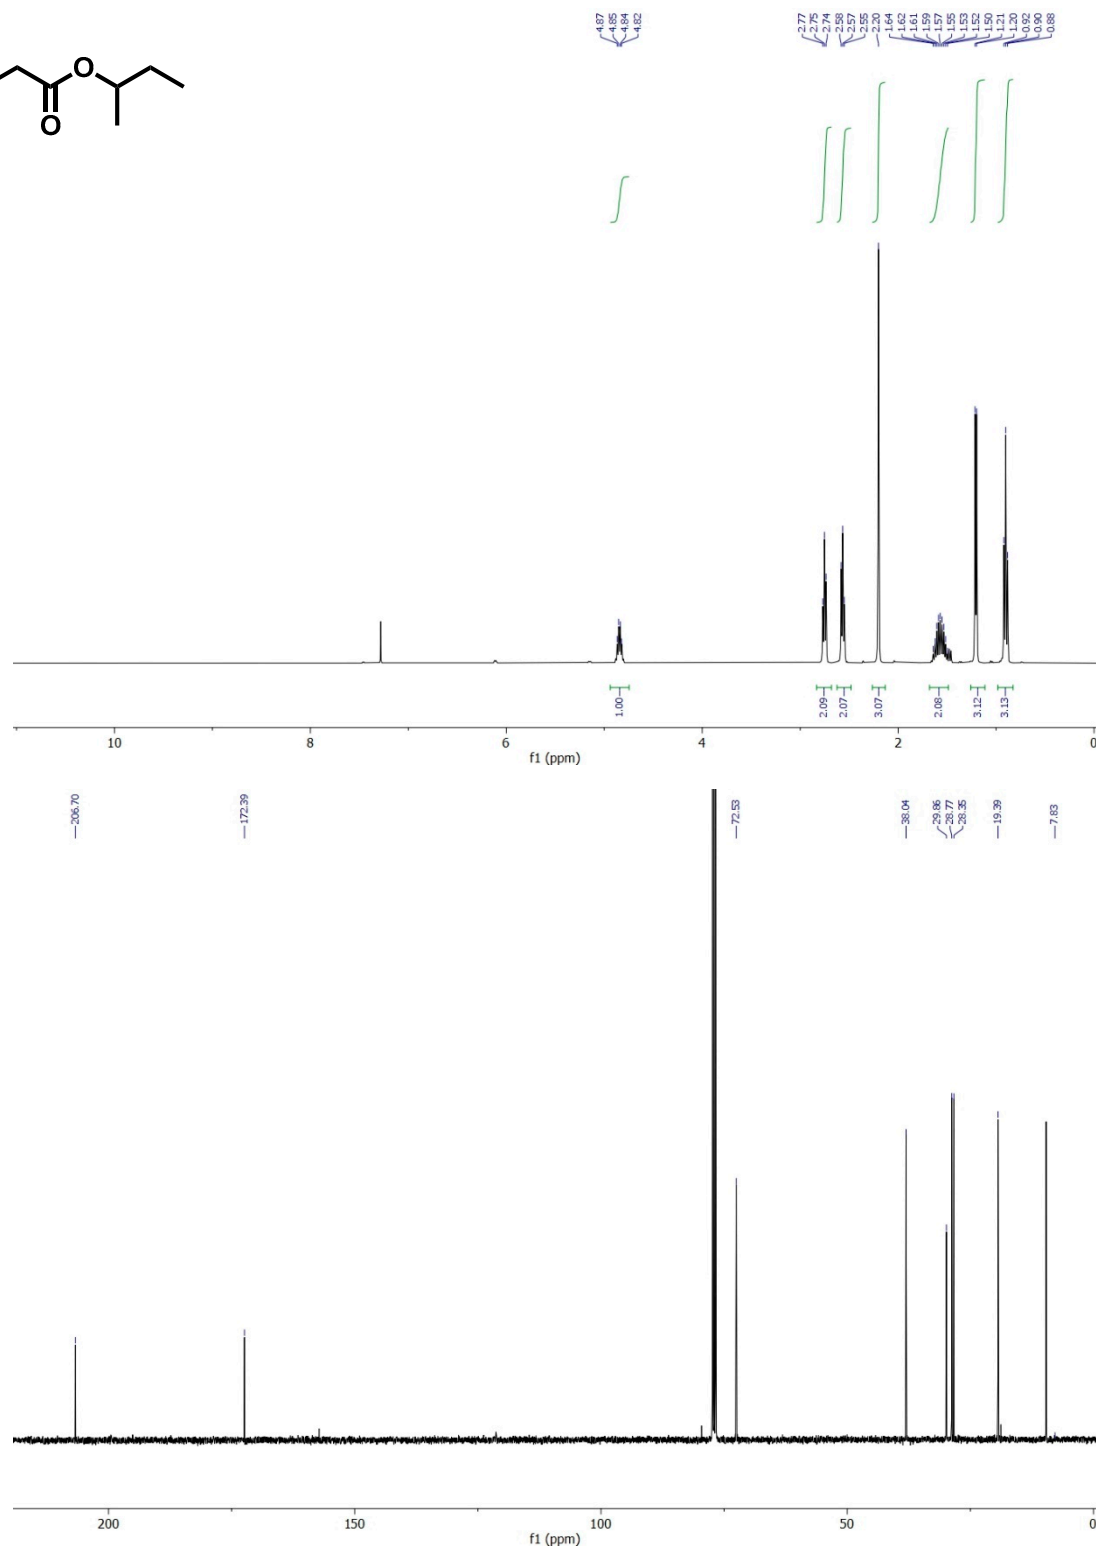

# $^1\text{H}$ -NMR, $^{13}\text{C}$ -NMR and Hi-Res Mass spectra of Allyl Levulinate (AllLev)

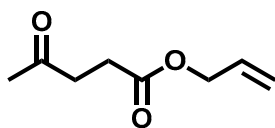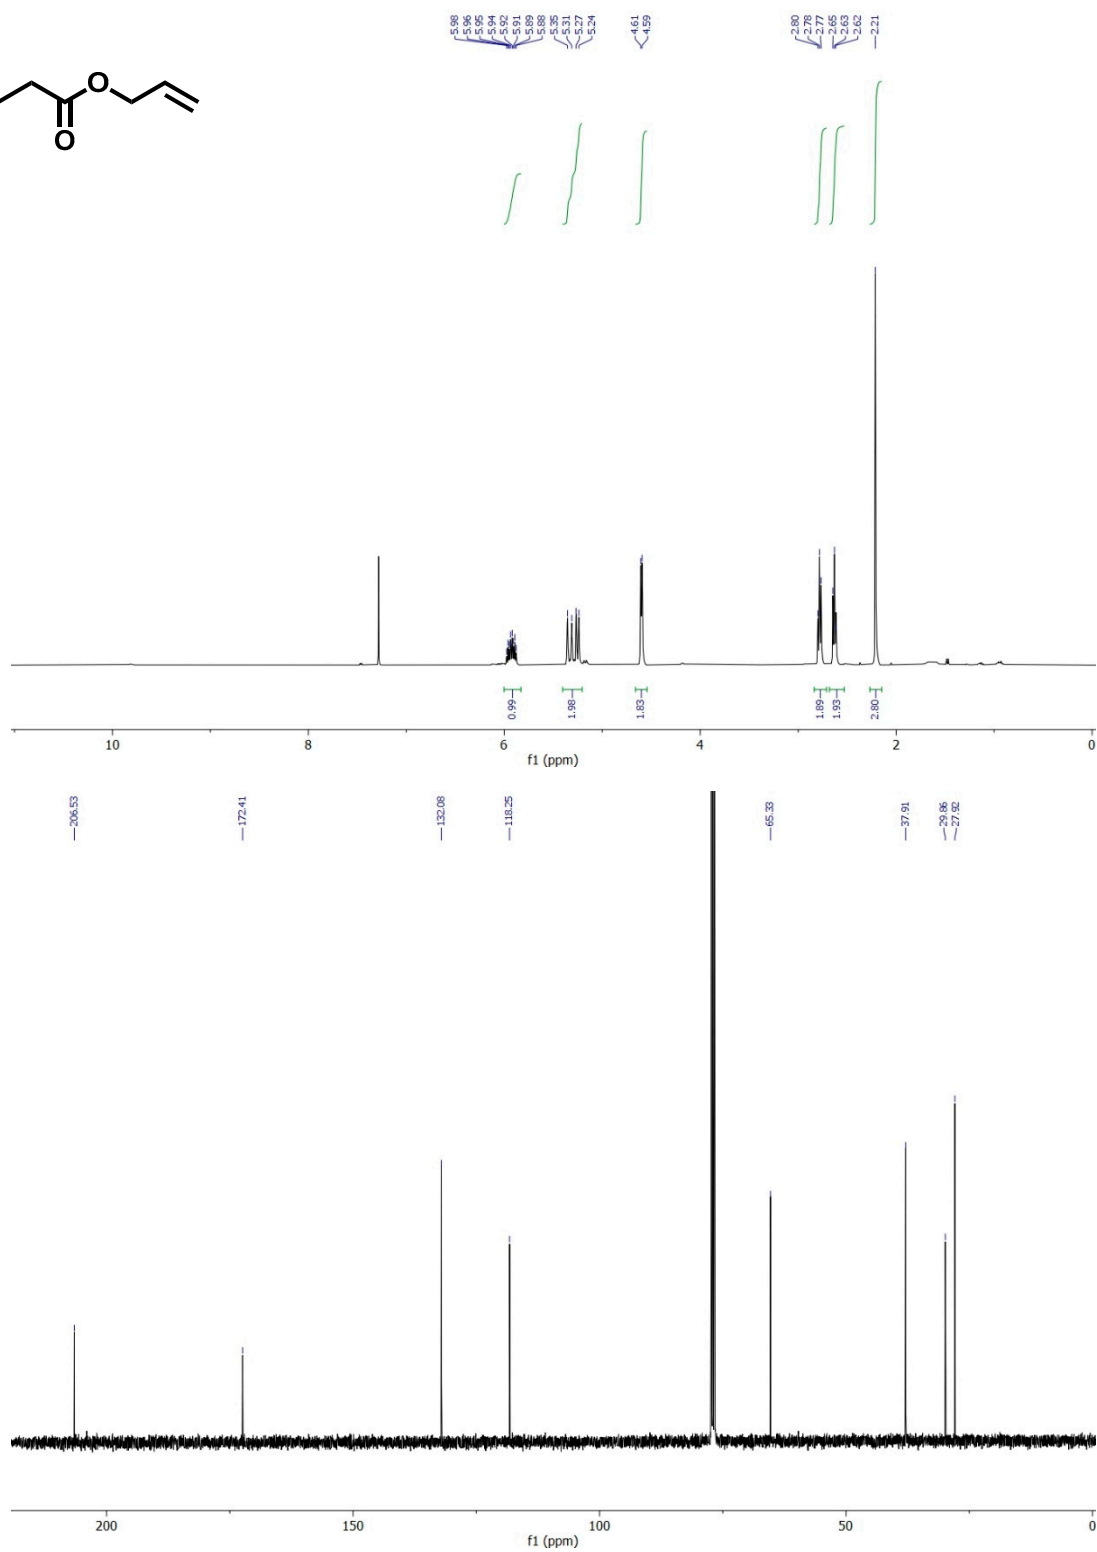

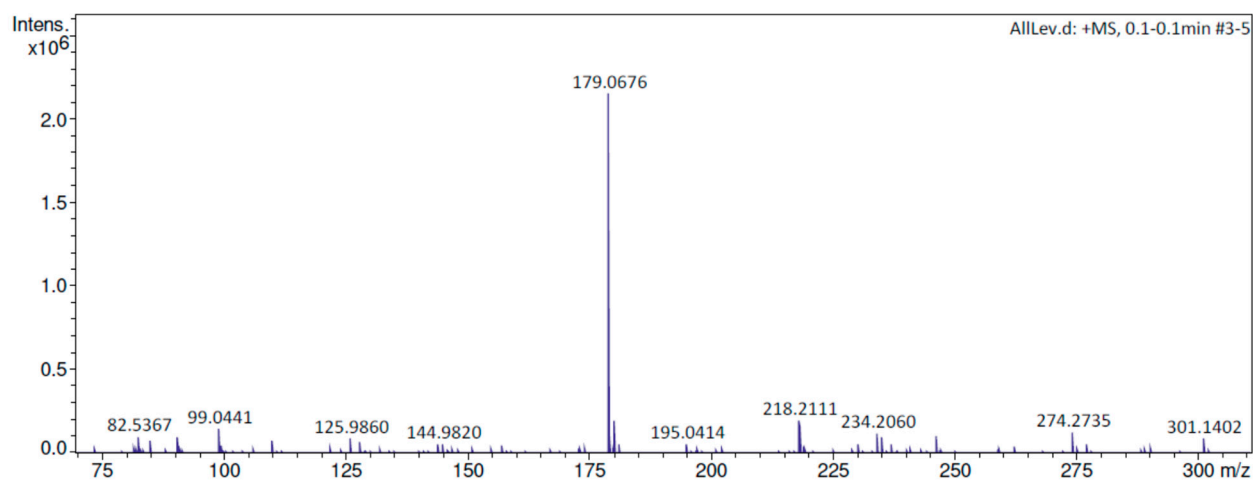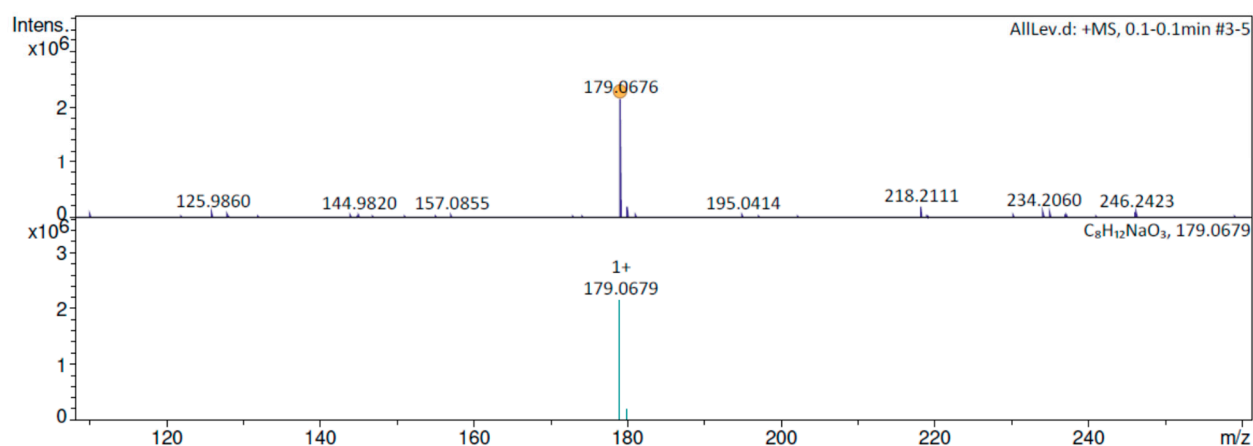

| Meas. m/z | # | Ion Formula                                      | m/z      | err [ppm] | mSigma | # mSigma | Score  | rdB | e <sup>-</sup> | Conf | N-Rule |
|-----------|---|--------------------------------------------------|----------|-----------|--------|----------|--------|-----|----------------|------|--------|
| 179.0676  | 1 | C <sub>8</sub> H <sub>12</sub> NaO <sub>3</sub>  | 179.0679 | 1.7       | 8.1    | 1        | 100.00 | 3.0 | even           |      | ok     |
|           | 2 | C <sub>4</sub> H <sub>8</sub> N <sub>6</sub> NaO | 179.0652 | -13.3     | 18.3   | 2        | 21.80  | 4.0 | even           |      | ok     |

#### Analysis Info

Analysis Name: D:\Data\Jack\LipidomicaEMA190521\Mattia210521\AllLev.d  
 Method: DirectInfusion - MS - positive.m  
 Sample Name: AllLev  
 Comment:

Acquisition Date: 5/21/2021 4:32:14 PM

Operator: Demo User  
 Instrument: compact 8255754.20209

#### Acquisition Parameter

|             |            |                       |           |                  |           |
|-------------|------------|-----------------------|-----------|------------------|-----------|
| Source Type | ESI        | Ion Polarity          | Positive  | Set Nebulizer    | 0.4 Bar   |
| Focus       | Not active | Set Capillary         | 4500 V    | Set Dry Heater   | 180 °C    |
| Scan Begin  | 50 m/z     | Set End Plate Offset  | -500 V    | Set Dry Gas      | 4.0 l/min |
| Scan End    | 1000 m/z   | Set Collision Cell RF | 650.0 Vpp | Set Divert Valve | Source    |
